# Supplementary material for: Functional Characteristics of the Naked Mole Rat μ-Opioid Receptor
Source: PubMed Central journal article supplement (PMC3842265; doi:10.1371/journal.pone.0079121), 2013-11-27
Supplement: pone.0079121.s005.pdf [file pone.0079121.s005.pdf]

**Rat pCMV-oprml-IRES-eGFP Vector map**

LOCUS pCMV-Rat oprml-IRES-eGFP 6498 bp ds-DNA circular

ORGANISM Rat (*Rattus norvegicus*)

FEATURES Location/Qualifiers

|                  |            |
|------------------|------------|
| CMV-Promotor     | 10..589    |
| Rat <i>oprml</i> | 622..1818  |
| <i>IRES</i>      | 1856..2440 |
| <i>eGFP</i>      | 2444..3163 |
| SV40_promoter    | 4175..4354 |
| Kan/neoR         | 4394..5188 |

ORIGIN

|      |                   |                      |                    |                   |                          |                    |
|------|-------------------|----------------------|--------------------|-------------------|--------------------------|--------------------|
| 1    | TAGTTATTAA        | TAGTAATCAA           | TTACGGGGTC         | ATTAGTTCAT        | AGCCCATATA               | TGGAGTTCGG         |
| 61   | CGTTACATAA        | CTTACGGTAA           | ATGGCCCCGC         | TGGCTGACCG        | CCCAACGACC               | CCCGCCATT          |
| 121  | GACGTCAATA        | ATGACGTATG           | TTCCCATAGT         | AACGCCAATA        | GGGACTTTCC               | ATTGACGTCA         |
| 181  | ATGGGTGGAG        | TATTTACGGT           | AAACTGCCCA         | CTTGGCAGTA        | CATCAAGTGT               | ATCATATGCC         |
| 241  | AAGTACGCCC        | CCTATTGACG           | TCAATGACGG         | TAAATGGCCC        | CTTGGCATT                | ATGCCAGTA          |
| 301  | CATGACCTTA        | TGGGACTTTC           | CTACTTGGCA         | GTACATCTAC        | GTATTAGTCA               | TCGCTATTAC         |
| 361  | CATGGTGATG        | CGGTTTTGGC           | AGTACATCAA         | TGGGCGTGGA        | TAGCGGTTTG               | ACTCACGGGG         |
| 421  | ATTTCCAAGT        | CTCCACCCCA           | TTGACGTCAA         | TGGGAGTTTG        | TTTTGGCACC               | AAAATCAACG         |
| 481  | GGACTTTCCA        | AAATGTCGTA           | ACAACCTCCG         | CCCATTGACG        | CAAATGGGCG               | GTAGGCGTGT         |
| 541  | ACGGTGGGAG        | GTCTATATAA           | GCAGAGCTGG         | TTTAGTGAAC        | CGTCAGATCC               | GCTAGCGCTA         |
| 601  | CCGGACTCAG        | ATCTCGAGCT           | <b>CATG</b> GACAGC | AGCACCGGCC        | CAGGGAACAC               | CAGCGACTGC         |
| 661  | TCAGACCCCT        | TAGCTCAGGC           | AAGTTGCTCC         | CCAGCACCTG        | GCTCCTGGCT               | CAACTTGTCC         |
| 721  | CACGTTGATG        | GCAACCAGTC           | CGATCCATGC         | GGTCTGAACC        | GCACCGGGCT               | TGGCGGGAAC         |
| 781  | GACAGCCTGT        | GCCCTCAGAC           | CGGCAGCCCT         | TCCATGGTCA        | CAGCCATTAC               | CATCATGGCC         |
| 841  | CTCTACTCTA        | TCGTGTGTGT           | AGTGGGCCTC         | TTCGGAAACT        | TCCTGGTCAT               | GTATGTGATT         |
| 901  | GTAAGATACA        | CCAAAATGAA           | GACTGCCACC         | AACATCTACA        | TTTTCAACCT               | TGCTCTGGCA         |
| 961  | GACGCCTTAG        | CGACCAGTAC           | ACTGCCCTTT         | CAGAGTGTCA        | ACTACCTGAT               | GGGAACATGG         |
| 1021 | CCCTTCGGAA        | CCATCCTCTG           | CAAGATCGTG         | ATCTCAATAG        | ATTACTACAA               | CATGTTTACC         |
| 1081 | AGCATATTCA        | CCCTCTGCAC           | CATGAGCGTG         | GACCGCTACA        | TTGCTGTCTG               | CCACCCAGTC         |
| 1141 | AAAGCCCTGG        | ATTTCCGTAC           | CCCCGAAAT          | GCCAAAATCG        | TCAACGTCTG               | CAACTGGATC         |
| 1201 | CTCTATTCTG        | CCATCGTCT            | GCCTGTAATG         | TTTATGGCAA        | CCACAAAATA               | CAGCAGGGG          |
| 1261 | TCCATAGATT        | GCACCCTCAC           | GTTCTCCAC          | CCAACCTGGT        | ACTGGGAGAA               | CCTGCTCAAA         |
| 1321 | ATCTGTGTCT        | TTATCTTCGC           | TTTCATCATG         | CCGGTCCTCA        | TCATCACTGT               | GTGTTACGGC         |
| 1381 | CTGATGATCT        | TACGACTCAA           | GAGCGTTTCG         | ATGCTATCGG        | GCTCCAAAGA               | AAAGGACAGG         |
| 1441 | AATCTGCGCA        | GGATCACCCG           | GATGGTGCTG         | GTGGTCGTGG        | CTGTATTTAT               | CGTCTGCTGG         |
| 1501 | ACCCCATCC         | ACATCTACGT           | CATCATCAAA         | GCGCTGATCA        | CGATTCCAGA               | AACCACATTT         |
| 1561 | CAGACCGTTT        | CCTGGCACTT           | CTGCATTGCT         | TTGGGTTACA        | CGAACAGCTG               | CCTGAATCCA         |
| 1621 | GTTCTTTACG        | CCTTCCTGGA           | TGAAAACCTC         | AAGCGATGCT        | TCAGAGAGTT               | CTGCATCCCA         |
| 1681 | ACCTCGTCCA        | CGATCGAACA           | GCAAAACTCC         | ACTCGAGTCC        | GTCAGAACAC               | TAGGGAACAT         |
| 1741 | CCCTCCACGG        | CTAATACAGT           | GGATCGAACT         | AACCACCAGC        | TAGAAAATCT               | GGAGGCAGAA         |
| 1801 | ACTGCTCCAT        | TGCCCT <b>TA</b> AGA | ATTCTGCAGT         | CGACGGTACC        | GCGGGCCCCG               | GATCCGCCCC         |
| 1861 | <i>TCTCCCTCCC</i> | <i>CCCCCCTAA</i>     | <i>CGTTACTGGC</i>  | <i>CGAAGCCGCT</i> | <i>TGGAATAAGG</i>        | <i>CCGGTGTGCG</i>  |
| 1921 | <i>TTTGTCTATA</i> | <i>TGTTATTTTC</i>    | <i>CACCATATTG</i>  | <i>CCGTCTTTTG</i> | <i>GCAATGTGAG</i>        | <i>GGCCCGGAAA</i>  |
| 1981 | <i>CCTGGCCCTG</i> | <i>TCTTCTTGAC</i>    | <i>GAGCATTCTT</i>  | <i>AGGGGTCTTT</i> | <i>CCCCTCTCGC</i>        | <i>CAAAGGAATG</i>  |
| 2041 | <i>CAAGGTCTGT</i> | <i>TGAATGTCGT</i>    | <i>GAAGGAAGCA</i>  | <i>GTTCCTCTGG</i> | <i>AAGCTTCTTG</i>        | <i>AAGACAAACA</i>  |
| 2101 | <i>ACGTCTGTAG</i> | <i>CGACCCTTTG</i>    | <i>CAGGCAGCGG</i>  | <i>AACCCCCAC</i>  | <i>CTGGCGACAG</i>        | <i>GTGCTCTGCG</i>  |
| 2161 | <i>GGCCAAAAGC</i> | <i>CACGTGTATA</i>    | <i>AGATACACCT</i>  | <i>GCAAAGGCGG</i> | <i>CACAACCCCA</i>        | <i>GTGCCACGTT</i>  |
| 2221 | <i>GTGAGTTGGA</i> | <i>TAGTTGTGGA</i>    | <i>AAGAGTCAA</i>   | <i>TGGCTCTCCT</i> | <i>CAAGCGTATT</i>        | <i>CAACAAGGGG</i>  |
| 2281 | <i>CTGAAGGATG</i> | <i>CCCAGAAGGT</i>    | <i>ACCCATTGT</i>   | <i>ATGGGATCTG</i> | <i>ATCTGGGGCC</i>        | <i>TCGGTGCACA</i>  |
| 2341 | <i>TGCTTTACAT</i> | <i>GTGTTTAGTC</i>    | <i>GAGGTTAAAA</i>  | <i>AAACGTCTAG</i> | <i>GCCCCCGAA</i>         | <i>CCACGGGGAC</i>  |
| 2401 | <i>GTGGTTTTCC</i> | <i>TTTGAAAAAC</i>    | <i>ACGATGATAA</i>  | <i>TATGGCCACA</i> | <i>ACC<b>AT</b>GGTGA</i> | <i>GCAAGGGCGA</i>  |
| 2461 | <i>GGAGCTGTTC</i> | <i>ACCGGGGTGG</i>    | <i>TGCCCATCCT</i>  | <i>GGTCGAGCTG</i> | <i>GACGGCGACG</i>        | <i>TAAACGGCCA</i>  |
| 2521 | <i>CAAGTTCAGC</i> | <i>GTGTCCGGCG</i>    | <i>AGGGCGAGGG</i>  | <i>CGATGCCACC</i> | <i>TACGGCAAGC</i>        | <i>TGACCCTGAA</i>  |
| 2581 | <i>GTTTATCTGC</i> | <i>ACCACCGGCA</i>    | <i>AGCTGCCCGT</i>  | <i>GCCCTGGCCC</i> | <i>ACCCTCGTGA</i>        | <i>CCACCCTGAC</i>  |
| 2641 | <i>CTACGGCGTG</i> | <i>CAGTGCTTCA</i>    | <i>GCCGCTACCC</i>  | <i>CGACCACATG</i> | <i>AAGCAGCACG</i>        | <i>ACTTCTTCAA</i>  |
| 2701 | <i>GTCCGCCATG</i> | <i>CCCGAAGGCT</i>    | <i>ACGTCCAGGA</i>  | <i>GCGCACCATC</i> | <i>TTCTTCAAGG</i>        | <i>ACGACGGCAA</i>  |
| 2761 | <i>CTACAAGACC</i> | <i>CGCGCCGAGG</i>    | <i>TGAAGTTCGA</i>  | <i>GGGCGACACC</i> | <i>CTGGTGAACC</i>        | <i>GCATCGAGCT</i>  |
| 2821 | <i>GAAGGGCATC</i> | <i>GACTTCAAGG</i>    | <i>AGGACGGCAA</i>  | <i>CATCCTGGGG</i> | <i>CACAAGCTGG</i>        | <i>AGTACAACATA</i> |
| 2881 | <i>CAACAGCCAC</i> | <i>AACGTCTATA</i>    | <i>TCATGGCCGA</i>  | <i>CAAGCAGAAG</i> | <i>AACGGCATCA</i>        | <i>AGGTGAACTT</i>  |
| 2941 | <i>CAAGATCCGC</i> | <i>CACAACATCG</i>    | <i>AGGACGGCAG</i>  | <i>CGTGCAGCTC</i> | <i>GCCGACCACT</i>        | <i>ACCAGCAGAA</i>  |
| 3001 | <i>CACCCCATC</i>  | <i>GGCGACGGCC</i>    | <i>CCGTGCTGCT</i>  | <i>GCCCGACAAC</i> | <i>CACTACCTGA</i>        | <i>GCACCCAGTC</i>  |
| 3061 | <i>CGCCCTGAGC</i> | <i>AAAGACCCCA</i>    | <i>ACGAGAAGCG</i>  | <i>CGATCACATG</i> | <i>GTCTGCTGG</i>         | <i>AGTTCGTGAC</i>  |
| 3121 | <i>CGCCGCCGGG</i> | <i>ATCACTCTCG</i>    | <i>GCATGGACGA</i>  | <i>GCTGTACAAG</i> | <b>TAA</b> AGCGGCC       | <i>GCGACTCTAG</i>  |

3181 ATCATAATCA GCCATACCAC ATTTGTAGAG GTTTTACTTG CTTTAAAAAA CCTCCACAC  
3241 CTCCCCCTGA ACCTGAAACA TAAAATGAAT GCAATTGTTG TTGTAACTT GTTTATTGCA  
3301 GCTTATAATG GTTACAAATA AAGCAATAGC ATCACAAATT TCACAAATA AGCATTTTTT  
3361 TCACTGCATT CTAGTTGTGG TTTGTCCAAA CTCATCAATG TATCTTAAGG CGTAAATTGT  
3421 AAGCGTTAAT ATTTTGTAA AATTCGCGTT AAATTTTTGT TAAATCAGCT CATTTTTTAA  
3481 CCAATAGGCC GAAATCGGCA AAATCCCTTA TAAATCAAAA GAATAGACCG AGATAGGGTT  
3541 GAGTGTGTGTT CCAGTTTGGG ACAAGAGTCC ACTATTAAAG AACGTGGACT CCAACGTCAA  
3601 AGGGCGAAAA ACCGTCTATC AGGGCGATGG CCCACTACGT GAACCATCAC CCTAATCAAG  
3661 TTTTTTGGGG TCGAGGTGCC GTAAAGCACT AAATCGGAAC CCTAAAGGGA GCCCCGATT  
3721 TAGAGCTTGA CGGGGAAAGC CGGCGAACGT GGCGAGAAAG GAAGGGAAGA AAGCGAAAGG  
3781 AGCGGGCGCT AGGGCGCTGG CAAGTGTAGC GGTCACGCTG CGCGTAAACA CCACACCCGC  
3841 CGCGCTTAAT GCGCCGCTAC AGGGCGCGTC AGGTGGCACT TTTGGGGAA ATGTGCGCGG  
3901 AACCCCTATT TGTTTATTTT TCTAAATACA TTCAAATATG TATCCGCTCA TGAGACAATA  
3961 ACCCTGATAA ATGCTTCAAT AATATTGAAA AAGGAAGAGT CCTGAGGCGG AAAGAACCAG  
4021 CTGTGGAATT TGTGTCAATT AGGGTGTGGA AAGTCCCCAG GCTCCCCAG AGGCAGAAGT  
4081 ATGCAAAGCA TGCATCTCAA TTAGTCAGCA ACCAGGTGTG GAAAGTCCCC AGGCTCCCCA  
4141 GCAGGCAGAA GTATGCAAAG CATGCATCTC AATTAGTCAG CAACCATAGT CCCGCCCTA  
4201 ACTCCGCCCA TCCCGCCCT AACTCCGCC AGTTCCGCC ATTCTCCGCC CCATGGCTGA  
4261 CTAATTTTTT TTATTTATGC AGAGGCCGAG GCCGCCTCGG CCTCTGAGCT ATTCCAGAAG  
4321 TAGTGAGGAG GCTTTTTTGG AGGCCTAGGC TTTTGCAAAG ATCGATCAAG AGACAGGATG  
4381 AGGATCGTTT CGCATGATTG AACAAAGATGG ATTGACGCA GGTTCCTCCG CCGCTTGGGT  
4441 GGAGAGGCTA TTCGGCTATG ACTGGGCACA ACAGACAATC GGCTGCTCTG ATGCCGCCGT  
4501 GTTCCGGCTG TCAGCGCAGG GCGCCCCGGT TCTTTTTGTC AAGACCGACC TGTCCGGTGC  
4561 CCTGAATGAA CTGCAAGACG AGGCAGCGCG GCTATCGTGG CTGGCCACGA CGGGCGTTCC  
4621 TTGCGCAGCT GTGCTCGACG TTGTCACTGA AGCGGGAAGG GACTGGCTGC TATTGGGCGA  
4681 AGTGCCGGGG CAGGATCTCC TGTCACTCA CTTTGCTCCT GCCGAGAAAG TATCCATCAT  
4741 GGCTGATGCA ATGCGGCGGC TGCATACGCT TGATCCGGCT ACCTGCCCAT TCGACCACCA  
4801 AGCGAAACAT CGCATCGAGC GAGCACGTAC TCGGATGGAA GCCGGTCTTG TCGATCAGGA  
4861 TGATCTGGAC GAAGAGCATC AGGGGCTCGC GCCAGCCGAA CTGTTCCGA GGCTCAAGGC  
4921 GAGCATGCCC GACGGCGAGG ATCTCGTCGT GACCCATGGC GATGCCTGCT TGCCGAATAT  
4981 CATGGTGGAA AATGGCCGCT TTTCTGGATT CATCGACTGT GGCCGGCTGG GTGTGGCGGA  
5041 CCGTATCAG GACATAGCGT TGGTACCCG TGATATTGCT GAAGACTTGG CGGCAGATG  
5101 GGCTGACCGC TTCCTCGTGC TTTACGGTAT CGCCGCTCCC GATTCCGAGC GCATCGCCTT  
5161 CTATCGCCTT CTTGACGAGT TCTTCTGAGC GGGACTCTGG GGTTCGAAAT GACCGACCAA  
5221 GCGACGCCCA ACCTGCCATC ACGAGATTTT GATTCCACCG CCGCCTTCTA TGAAAGGTTG  
5281 GGCTTCGGAA TCGTTTTCCG GGACGCCGGC TGGATGATCC TCCAGCGCGG GGATCTCATG  
5341 CTGGAGTTCT TCGCCACCC TAGGGGGAGG CTAAGTAAA CACGGAAGGA GACAATACCG  
5401 GAAGGAACCC GCGCTATGAC GGCAATAAAA AGACAGAATA AAACGCACGG TGTTGGGTGCG  
5461 TTTGTTTATA AACGCGGGGT TCGGTCCCAG GGCTGGCACT CTGTGATAC CCCACCGAGA  
5521 CCCATTGGG GCCAATACGC CCGCGTTTCT TCCTTTTCCC CACCCACCC CCCAAGTTCG  
5581 GGTGAAGGCC CAGGGCTCGC AGCCAACGTC GGGGCGGCAG GCCCTGCCAT AGCCTCAGGT  
5641 TACTCATATA TACTTTAGAT TGATTTAAAA CTTCATTTTT AATTTAAAAG GATCTAGGTG  
5701 AAGATCCTTT TTGATAATCT CATGACCAA ATCCCTAAC GTGAGTTTTT GTTCCACTGA  
5761 GCGTCAGACC CCGTAGAAAA GATCAAAGGA TCTTCTTGAG ATCCTTTTTT TCTGCGCGTA  
5821 ATCTGCTGCT TGCAAACAAA AAAACCACCG CTACCAGCGG TGGTTTGTTT GCCGGATCAA  
5881 GAGTACCAA CTCTTTTTCC GAAGGTAACT GGCTTCAGCA GAGCGCAGAT ACCAAATACT  
5941 GTCCTTCTAG TGTAGCCGTA GTTAGGCCAC CACTTCAAGA ACTCTGTAGC ACCGCCTACA  
6001 TACCTCGCTC TGCTAATCCT GTTACCAGT GCTGCTGCCA GTGGCGATAA GTCGTGTCTT  
6061 ACCGGTTGG ACTCAAGACG ATAGTTACCG GATAAGGCGC AGCGGTCCGG CTGAACGGGG  
6121 GGTTCGTGCA CACAGCCCAG CTTGGAGCGA ACGACCTACA CCGAACTGAG ATACCTACAG  
6181 CGTGAGCTAT GAGAAAGCGC CACGCTTCCC GAAGGGAGAA AGGCGGACAG GTATCCGGTA  
6241 AGCGGCAGGG TCGGAACAGG AGAGCGCACG AGGGAGCTTC CAGGGGAAAA CGCCTGGTAT  
6301 CTTTATAGTC CTGTGCGGTT TCGCCACCTC TGACTTGAGC GTCGATTTTT GTGATGCTCG  
6361 TCAGGGGGGC GGAGCCTATG GAAAAACGCC AGCAACGCGG CCTTTTTACG GTTCTGGCC  
6421 TTTTGCTGGC CTTTGTCTCA CATGTTCTTT CCTGCGTTAT CCCCTGATTC TGTGGATAAC  
6481 CGTATTACCG CCATGCAT
