# Supplementary material for: Functional Characteristics of the Naked Mole Rat μ-Opioid Receptor
Source: PubMed Central journal article supplement (PMC3842265; doi:10.1371/journal.pone.0079121), 2013-11-27
Supplement: pone.0079121.s006.pdf [file pone.0079121.s006.pdf]

**NMR pCMV-*oprml*-IRES-eGFP Vector map**

LOCUS pCMV-NMR *oprml*-IRES-eGFP 6512 bp ds-DNA circular

ORGANISM Naked mole rat (*Heterocephalus glaber*)

FEATURES Location/Qualifiers

CMV promoter 10..589  
**NMR *oprml*** 625..1827  
*IRES* 1870..2454  
**eGFP** 2458..3177  
SV40\_promoter 4189..4368  
Kan/neoR 4408..5202

ORIGIN

```

1 TAGTTATTAA TAGTAATCAA TTACGGGGTC ATTAGTTCAT AGCCCATATA TGGAGTTCCG
61 CGTTACATAA CTTACGGTAA ATGGCCCGCC TGGCTGACCG CCCAACGACC CCCGCCATT
121 GACGTCAATA ATGACGTATG TTCCCATAGT AACGCCAATA GGGACTTTCC ATTGACGTCA
181 ATGGGTGGAG TATTTACGGT AAAGTGCCCA CTTGGCAGTA CATCAAGTGT ATCATATGCC
241 AAGTACGCCC CCTATTGACG TCAATGACGG TAAATGGCCC GCCTGGCATT ATGCCAGTA
301 CATGACCTTA TGGGACTTTC CTACTTGGCA GTACATCTAC GTATTAGTCA TCGCTATTAC
361 CATGGTGATG CGGTTTTGGC AGTACATCAA TGGGCGTGGA TAGCGGTTTG ACTCACGGGG
421 ATTTCCAAGT CTCCACCCCA TTGACGTCAA TGGGAGTTTG TTTTGGCACC AAAATCAACG
481 GGACTTTTCCA AAATGTCGTA ACAACTCCGC CCCATTGACG CAAATGGGCG GTAGCCGTGT
541 ACGGTGGGAG GTCTATATAA GCAGAGCTGG TTTAGTGAAC CGTCAGATCC GCTAGCGCTA
601 CCGGACTCAG ATCTCGAGAG CACCATGGAC AGCAGTGTCC TGCCCGGGAA CGCGGGCAAT
661 TGCACCGATC CCTTCGCGCA ATCCAGTTGC TCCCTGGCAC CTAGCCCCGG TTCCTGGACT
721 AACTTGTCCC ACTTAGATGG CAATCTGTCC GACCCATGCG GTCCGAACCG CACCGAGCTA
781 GGGGGGAGCG ACAGCCGGTG CCCTCCGACT GGGAGCCCCT CCATGATCAC GGCTGTCACC
841 ATCATGGCCC TCTACTCCAT CGTGTGCGTG GTGGGGCTCT TTGGAAACTT CCTGGTCATG
901 TATGTGATCA TCAGATACAC CAAAATGAAG ACTGCCACCA ATATCTACAT TTTCAATCTT
961 GCTCTGGCAG ATGCCTTAGC TACCAGTACT CTGCCCTTCC AGAGTGTAAG TTACCTAATG
1021 GGAACATGGC CTTTTGGAAC CATCCTTTCG AAGATTGTGA TCTCTATAGA TTTACTACAAC
1081 ATGTTACCCA GCATATTCAC CCTCTGCACC ATGAGTGTGG ATCGTTATAT TGCAGTCTGC
1141 CACCCTGTCA AGGCCCTGGA TTTCCGTAAT CCCCAGAAATG CCAAAATTGT CAATGTCTGC
1201 AACTGGATCC TGTCTTCTGC CATTGGTCTG CCTGTAATGT TCATGGCAAC AACAAAATAC
1261 AGACATGGCT CCATAGATTG TACGCTAACA TTCTCTCACC CAACCTGGTA CTGGGAGAAC
1321 CTACTGAAGA TCTGTGTCTT CATCTTTGCC TTCATCATGC CTGTCTCAT AATTACAGTG
1381 TGTATGGGAG TGATGATCTT ACGCCTCAAG AGTGTCCGCA TGCTGTGAGG CTCCAAAGAA
1441 AAGGATAGGA ACCTGCGGAG GATCACCAGG ATGGTGTGGG TGTTGTGAGG TGATTTTATT
1501 GTCTGTGTTG CTTCCATTCA CATTATTGTC ATTATTAAAG CCTTGATCAC TATCCCAGAA
1561 ACTACTTTCC AAACAGTTTC ATGGCACTTC TGCATTGCTC TAGGTTACAC AAACAGCTGC
1621 CTGAACCCAG TCCTGTATGC GTTTCTGGAT GAAAACCTCA AACGATGCTT CAGAGAATTC
1681 TGTATCCCAA CCTCCTCCAC GATTGAGCAA CAAAACCTCA CTCGAATTCTG TCAGAACACT
1741 AGAGACCACC CCTCCACCGC CAACACAGTG GACAGAACAA ACCATCAGCT GGAAAATCTG
1801 GAAGCAGAAA CAGCTCCGTT GCCCTAACTG GGTCTTGCTG CAGTCGACGG TACCGCGGGC
1861 CCGGGATCCG CCCCTCTCCC TCCCCCCCCC CTAACGTTAC TGGCCGAAGC CGCTTGGAAAT
1921 AAGGCCGGTG TGCGTTTGTGC TATATGTTAT TTTCCACCAT ATTGCCGTCT TTTGGCAATG
1981 TGAGGGCCCG GAAACCTGGC CCTGTCTTCT TGACGAGCAT TCCTAGGGGT CTTTCCCCTC
2041 TCGCCAAAGG AATGCAAGGT CTGTTGAATG TCGTGAAGGA AGCAGTTCTT CTGGAAGCTT
2101 CTTGAAGACA AACAACGTTT GTAGCGACCC TTTGCAGGCA GCGGAACCCC CCACCTGGCG
2161 ACAGGTGCCT CTGCGGCCAA AAGCCACGTG TATAAGATAC ACCTGCAAAG GCGGCACAAC
2221 CCCAGTGCCA CGTTGTGAGT TGGATAGTTG TGGAAAGAGT CAAATGGCTC TCCTCAAGCG
2281 TATTC AACAA GGGGCTGAAG GATGCCCAGA AGGTACCCCA TTGTATGGGA TCTGATCTGG
2341 GGCCTCGGTG CACATGCTTT ACATGTGTTT AGTCGAGGTT AAAAAACGT CTAGGCCCCC
2401 CGAACCACGG GGACGTGGTT TTCTTTGAA AAACACGATG ATAATATGGC CACAACCATG
2461 GTGAGCAAGG GCGAGGAGTT GTTACCCGGG GTGGTGCCCA TCCTGGTCTGA GCTGGACGGC
2521 GACGTAAACG GCCACAAGTT CAGCGTGTCC GGCGAGGGCG AGGGCGATGC CACTACGGC
2581 AAGCTGACCC TGAAGTTCAT CTGCACCACC GGCAAGCTGC CCGTGCCCTG GCCCACCTC
2641 GTGACCACCC TGACCTACGG CGTGCAGTGC TTCAGCCGCT ACCCCGACCA CATGAAGCAG
2701 CACGACTTCT TCAAGTCCGC CATGCCCGAA GGCTACGTCC AGGAGCGCAC CATCTTCTTC
2761 AAGGACGACG GCAACTACAA GACCCGCGCC GAGGTGAAGT TCGAGGGCGA CACCCTGGTG
2821 AACCGCATCG AGCTGAAGGG CATCGACTTC AAGGAGGACG GCAACATCCT GGGGCACAAG
2881 CTGGAGTACA ACTACAACAG CCACAACGTC TATATCATGG CCGACAAGCA GAAGAACGGC
2941 ATCAAGGTGA ACTTCAAGAT CCGCCACAAC ATCGAGGACG GCAGCGTGCA GCTCGCCGAC
3001 CACTACCAGC AGAACACCCC CATCGGCGAC GGCCCCGTGC TGCTGCCCGA CAACCACTAC
3061 CTGAGCACCC AGTCCGCCCT GAGCAAAGAC CCCAACGAGA AGCGCGATCA CATGGTCTTG
3121 CTGGAGTTCG TGACCGCCCG CGGGATCACT CTCGGCATGG ACGAGCTGTA CAAGTAAAGC
3181 GGCCGCGACT CTAGATCATA ATCAGCCATA CCACATTTGT AGAGGTTTTA CTTGCTTTAA

```

3241 AAAACCTCCC ACACCTCCCC CTGAACCTGA AACATAAAAT GAATGCAATT GTTGTGTGTTA  
3301 ACTTGTTTTAT TGCAGCTTAT AATGGTTACA AATAAAGCAA TAGCATCACA AATTTACAAA  
3361 ATAAAGCATT TTTTTCCTG CATTCTAGTT GTGGTTTGTC CAAACTCATC AATGTATCTT  
3421 AAGGCGTAAA TTGTAAGCGT TAATATTTTG TTAATAATTCG CGTTAAATTT TTGTTAAATC  
3481 AGCTCATT TTAACCAATA GGCCGAAATC GGCAAAATCC CTTATAAAATC AAAAGAATAG  
3541 ACCGAGATAG GGTTGAGTGT TGTTCCAGTT TGGAACAAGA GTCCACTATT AAAGAACGTG  
3601 GACTCCAACG TCAAAGGGCG AAAAACCGTC TATCAGGGCG ATGGCCCACT ACGTGAACCA  
3661 TCACCCTAAT CAAGTTTTTTT GGGGTCGAGG TGCCGTAAAG CACTAAATCG GAACCCTAAA  
3721 GGGAGCCCC GATTTAGAGC TTGACGGGGA AAGCCGGCGA ACGTGGCGAG AAAGGAAGGG  
3781 AAGAAAGCGA AAGGAGCGGG CGCTAGGGCG CTGGCAAGTG TAGCGGTCAC GCTGCGCGTA  
3841 ACCACCACAC CCGCCGCGCT TAATGCGCCG CTACAGGGCG CGTCAGGTGG CACTTTTCGG  
3901 GGAAATGTGC GCGGAACCC TATTTGTTTA TTTTCTAAA TACATTCAA TATGTATCCG  
3961 CTCATGAGAC AATAACCCTG ATAAATGCTT CAATAATATT GAAAAAGGAA GAGTCCTGAG  
4021 GCGGAAAGAA CCAGCTGTGG AATGTGTGTC AGTTAGGGTG TGGAAAGTCC CCAGGCTCCC  
4081 CAGCAGGCAG AAGTATGCAA AGCATGCATC TCAATTAGTC AGCAACCAGG TGTGGAAAGT  
4141 CCCCAGGCTC CCCAGCAGGC AGAAGTATGC AAAGCATGCA TCTCAATTAG TCAGCAACCA  
4201 TAGTCCCGCC CCTAACTCCG CCCATCCCGC CCCTAACTCC GCCCAGTTCC GCCCATTCTC  
4261 CGCCCCATGG CTGACTAATT TTTTTATTT ATGCAGAGGC CGAGGCCGCG TCGGCCTCTG  
4321 AGCTATTCCA GAAGTAGTGA GGAGCTTTT TTGGAGGCC T AGGCTTTTGC AAAGATCGAT  
4381 CAAGAGACAG GATGAGGATC GTTTCGCATG ATTGAACAAG ATGGATTGCA CGCAGGTTCT  
4441 CCGGCCGCTT GGGTGGAGAG GCTATTCGGC TATGACTGGG CACAACAGAC AATCGGCTGC  
4501 TCTGATGCCG CCGTGTTCGG GCTGTCAGCG CAGGGGCGCC CGGTTCTTTT TGTCAAGACC  
4561 GACCTGTCCG GTGCCCTGAA TGAAGTCAA GACGAGGCAG CGCGCTATC GTGGCTGGCC  
4621 ACGACGGGCG TTCCTTGCGC AGCTGTGCTC GACGTTGTCA CTGAAGCGGG AAGGGACTGG  
4681 CTGCTATTGG GCGAAGTGCC GGGGCGAGGAT CTCCTGTCAT CTCACCTTGC TCCTGCCGAG  
4741 AAAGTATCCA TCATGGCTGA TGCAATGCGG CGGCTGCATA CGCTTGATCC GGCTACCTGC  
4801 CCATTGCGAC ACCAAGCGAA ACATCGCATC GAGCGAGCAC GTACTCGGAT GGAAGCCGGT  
4861 CTTGTGCGATC AGGATGATCT GGACGAAGAG CATCAGGGGC TCGCGCCAGC CGAACTGTTT  
4921 GCCAGGCTCA AGGCGAGCAT GCCCGACGGC GAGGATCTCG TCGTGACCCA TGGCGATGCC  
4981 TGCTTGCCGA ATATCATGGT GGAAAATGGC CGCTTTTCTG GATTCATCGA CTGTGGCCGG  
5041 CTGGGTGTGG CGGACCGCTA TCAGGACATA GCGTTGGCTA CCCGTGATAT TGCTGAAGAG  
5101 CTGGGCGGCG AATGGGCTGA CCGCTTCCTC GTGCTTTACG GTATCGCCGC TCCCGATTCCG  
5161 CAGCGCATCG CTTTCTATCG CTTTCTTGAC GAGTTCTTCT GAGCGGGACT CTGGGGTTCCG  
5221 AAATGACCGA CCAAGCGACG CCCAACCTGC CATCACGAGA TTTGATTCC ACCGCCGCT  
5281 TCTATGAAAG GTTGGGCTTC GGAATCGTTT TCCGGGACGC CGGCTGGATG ATCCTCCAGC  
5341 GCGGGGATCT CATGCTGGAG TTCTTCGCCC ACCCTAGGGG GAGGCTAAT GAAACACGGA  
5401 AGGAGACAAT ACCGGAAGGA ACCCGCCTA TGACGGCAAT AAAAAGACAG AATAAAACGC  
5461 ACGGTGTTGG GTCGTTTGT CATAAACGCG GGGTTCGGTC CCAGGGCTGG CACTCTGTCCG  
5521 ATACCCACC GAGACCCAT TGGGGCCAAT ACGCCCGCGT TTCTTCTTTT TCCCCACCCC  
5581 ACCCCCAAG TTCGGGTGAA GGCCAGGGC TCGCAGCCAA CGTCGGGGCG GCAGGCCCTG  
5641 CCATAGCCTC AGGTTACTCA TATATACTTT AGATTGATTT AAAACTTCAT TTTTAATTTA  
5701 AAAGGATCTA GGTGAAGATC CTTTTTGATA ATCTCATGAC CAAAATCCCT TAACGTGAGT  
5761 TTTCTGTTCCA CTGAGCGTCA GACCCCGTAG AAAAGATCAA AGGATCTTCT TGAGATCCTT  
5821 TTTTCTGCG CGTAATCTGC TGCTTGCAA CAAAAAACC ACCGCTACCA GCGGTGGTTT  
5881 GTTTGCCGGA TCAAGAGCTA CCAACTCTTT TTCCGAAGGT AACTGGCTTC AGCAGAGCGC  
5941 AGATAACAAA TACTGTCCTT CTAGTGTAGC CGTAGTTAGG CCACCCTTC AAGAACTCTG  
6001 TAGCACC GCC TACATACCTC GCTCTGCTAA TCCTGTTACC AGTGGCTGCT GCCAGTGGCG  
6061 ATAAGTCGTG TCTTACCGGG TTGGACTCAA GACGATAGTT ACCGGATAAG GCGCAGCGGT  
6121 CGGGCTGAAC GGGGGGTTCCG TGCACACAGC CCAGCTTGGG GCGAACGACC TACACCGAAC  
6181 TGAGATACCT ACAGCGTGAG CTATGAGAAA GCGCCACGCT TCCCGAAGGG AGAAAGGCGG  
6241 ACAGGTATCC GGTAAGCGGC AGGGTCGGAA CAGGAGAGCG CACGAGGGAG CTTCCAGGGG  
6301 GAAACGCCTG GTATCTTTAT AGTCCTGTCT GGTTTCGCCA CCTCTGACTT GAGCGTGCAT  
6361 TTTTGTGATG CTCGTCAGGG GGGCGGAGCC TATGGAAAA CGCCAGCAAC GCGGCCTTTT  
6421 TACGGTTCTT GGCCTTTTGC TGGCCTTTTG CTCACATGTT CTTTCTGCG TTATCCCCTG  
6481 ATTCTGTGGA TAACCGTATT ACCGCCATGC AT
