# Supplementary material for: Functional Characteristics of the Naked Mole Rat μ-Opioid Receptor
Source: PubMed Central journal article supplement (PMC3842265; doi:10.1371/journal.pone.0079121), 2013-11-27
Supplement: pone.0079121.s007.pdf [file pone.0079121.s007.pdf]

**pCMV-NMR oprm1eGFP Vector map**

LOCUS pCMV-NMR oprm1eGFP 5879 bp ds-DNA circular  
ORGANISM Naked mole rat (*Heterocephalus glaber*)  
COMMENT IRES was excised from pCMV-NMR oprm1-IRES-eGFP  
FEATURES Location/Qualifiers  
CMV-Promotor 10..589  
NMR oprm1 625..1824  
eGFP 1825..2544  
NMR delete IRES primer 1811..1838  
SV40\_promoter 3556..3735  
Kan/neoR 3775..4569

ORIGIN

```
1 TAGTTATTAA TAGTAATCAA TTACGGGGTC ATTAGTTCAT AGCCCATATA TGGAGTTCGG
61 CGTTACATAA CTTACGGTAA ATGGCCCGCC TGGCTGACCG CCCAACGACC CCCGCCATT
121 GACGTCAATA ATGACGTATG TTCCCATAGT AACGCCAATA GGGACTTTCC ATTGACGTCA
181 ATGGGTGGAG TATTTACGGT AAAGTCCCA CTTGGCAGTA CATCAAGTGT ATCATATGCC
241 AAGTACGCC CCTATTGACG TCAATGACGG TAAATGGCCC GCCTGGCATT ATGCCAGTA
301 CATGACCTTA TGGGACTTTC CTAAGTGGCA GTACATCTAC GTATTAGTCA TCGCTATTAC
361 CATGGTGATG CGGTTTTGGC AGTACATCAA TGGGCGTGGA TAGCGGTTTG ACTCACGGGG
421 ATTTCCAAGT CTCCACCCCA TTGACGTCAA TGGGAGTTTG TTTTGGCACC AAAATCAACG
481 GGACTTTCCA AAATGTCGTA ACAACTCCGC CCCATTGACG CAAATGGGCG GTAGGCGTGT
541 ACGGTGGGAG GTCTATATAA GCAGAGCTGG TTTAGTGAAC CGTCAGATCC GCTAGCGCTA
601 CCGGACTCAG ATCTCGAGAG CACCATGGAC AGCAGTGTCC TGCCCGGAA CGCGGGCAAT
661 TGCACCGATC CCTTCGCGCA ATCCAGTTGC TCCCTGGCAC CTAGCCCCGG TTCCTGGACT
721 AACTTGTCCC ACTTAGATGG CAATCTGTCC GACCCATGCG GTCCGAACCG CACCGAGCTA
781 GGGGGGAGCG ACAGCCGGTG CCCTCCGACT GGGAGCCCCT CCATGATCAC GGCTGTCACC
841 ATCATGGCCC TCTACTCCAT CGTGTGCGTG GTGGGGCTCT TTGGAAACTT CCTGGTCATG
901 TATGTGATCA TCAGATACAC CAAAATGAAG ACTGCCACCA ATATCTACAT TTTCAATCTT
961 GCTCTGGCAG ATGCCTTAGC TACCAGTACT CTGCCCTTCC AGAGTGTAAT TTTACTAATG
1021 GGAACATGGC CTTTTGGAAC CATCCTTTGC AAGATTGTGA TCTCTATAGA TTTACTACAAC
1081 ATGTTACCCA GCATATTCAC CCTCTGCACC ATGAGTGTGG ATCGTTATAT TGCAGTCTGC
1141 CACCCTGTCA AGGCCCTGGA TTTCCGTAAT CCCCAGAAATG CCAAAATTGT CAATGTCTGC
1201 AACTGGATCC TGTCTTCTGC CATTGGTCTG CCTGTAATGT TCATGGCAAC AACAAAATAC
1261 AGACATGGCT CCATAGATTG TACGCTAACA TTCTCTCACC CAACCTGGTA CTGGGAGAAC
1321 CTACTGAAGA TCTGTGTCTT CATCTTTGCC TTCATCATGC CTGTCCTCAT AATTACAGTG
1381 TGTTATGGAC TGATGATCTT ACGCCTCAAG AGTGTCCGCA TGCTGTGAGG CTCCAAAGAA
1441 AAGGATAGGA ACCTGCGGAG GATCACCAGG ATGGTGCTGG TGGTTGTGGC TGTATTTCATT
1501 GTCTGTGTTG CTCCCATTCA CATTATATGC ATTATTAAG CCTTGATCAC TATCCAGAA
1561 ACTACTTTCC AAACAGTTTC ATGGCACTTC TGCATTGCTC TAGGTTACAC AAACAGCTGC
1621 CTGAACCCAG TCCTGTATGC GTTTCTGGAT GAAAACCTCA AACGATGCTT CAGAGAATTC
1681 TGTATCCCAA CCTCCTCCAC GATTGAGCAA CAAAACCTCA CTCGAATTCTG TCAGAACACT
1741 AGAGACCACC CCTCCACCGC CAACACAGTG GACAGAACA ACCATCAGT GGAAAACCTG
1801 GAAGCAGAAA CAGCTCCGTT GCCCATGGT AGCAAGGGCG AGGAGCTGTT CACCGGGGTG
1861 GTGCCCATCC TGGTCGAGCT GGACGGCGAC GTAAACGGCC ACAAGTTCAG CGTGTCCGGC
1921 GAGGGCGAGG GCGATGCCAC CTACGGCAAG CTGACCCTGA AGTTCATCTG CACCACCGGC
1981 AAGCTGCCCG TGCCCTGGCC CACCCTCGTG ACCACCCTGA CCTACGGCGT GCAGTGCTTC
2041 AGCCGCTACC CCGACCACAT GAAGCAGCAC GACTTCTTCA AGTCCGCCAT GCCCGAAGGC
2101 TACGTCCAGG AGCGCACCAT CTTCTTCAAG GACGACGGCA ACTACAAGAC CCGCGCCGAG
2161 GTGAAGTTCG AGGGCGACAC CCTGGTGAAC CGCATCGAGC TGAAGGGCAT CGACTTCAAG
2221 GAGGACGGCA ACATCCTGGG GCACAAGCTG GAGTACAAC ACAACAGCCA CAACGTCTAT
2281 ATCATGGCCG ACAAGCAGAA GAACGGCATC AAGGTGAACT TCAAGATCCG CCACAACATC
2341 GAGGACGGCA GCGTGCAGCT CGCCGACCAC TACCAGCAGA ACACCCCAT CGGCGACGGC
2401 CCCGTGCTGC TGCCCCGAAA CCACTACCTG AGCACCCAGT CCGCCCTGAG CAAAGACCCC
2461 AACGAGAAGC GCGATCACAT GGTCTGCTG GAGTTCGTGA CCGCCGCCGG GATCACTCTC
2521 GGCATGGACG AGCTGTACAA GTAAAGCGGC CGCGACTCTA GATCATAATC AGCCATACCA
2581 CATTTGTAGA GGTTTTACTT GCTTTAAAAA ACCTCCCACA CCTCCCCCTG AACCTGAAAC
2641 ATAAAATGAA TGCAATTGTT GTTGTAAACT TGTTTATTGC AGCTTATAAT GGTTACAAAT
2701 AAAGCAATAG CATCACAAT TTTACAAATA AAGCATTTTT TTTACTGCAT TCTAGTTGTG
2761 GTTTGTCCAA ACTCATCAAT GTATCTTAAG GCGTAAATTG TAAGCGTTAA TATTTTGTTA
2821 AAAATCGCCT TAAATTTTTG TTAATCAGC TCATTTTTTA ACCAATAGGC CGAAATCGGC
2881 AAAATCCCTT ATAAATCAAA AGAATAGACC GAGATAGGGT TGAGTGTGTG TCCAGTTTGG
2941 AACAAGAGTC CACTATTAAA GAACGTGGAC TCCAACGTCA AAGGGCGAAA AACCGTCTAT
```

3001 CAGGGCGATG GCCCACTACG TGAACCATCA CCCTAATCAA GTTTTTTGGG GTCGAGGTGC  
3061 CGTAAAGCAC TAAATCGGAA CCCTAAAGGG AGCCCCCGAT TTAGAGCTTG ACGGGGAAAG  
3121 CCGGCGAACG TGGCGAGAAA GGAAGGGAAG AAAGCGAAAG GAGCGGGCGC TAGGGCGCTG  
3181 GCAAGTGTAG CGGTCACGCT GCGCGTAACC ACCACACCCG CCGCGCTTAA TGCGCCGCTA  
3241 CAGGGCGCGT CAGGTGGCAC TTTTCGGGGA AATGTGCGCG GAACCCCTAT TTGTTTATTT  
3301 TTCTAAATAC ATTCAAATAT GTATCCGCTC ATGAGACAAT AACCTGATA AATGCTTCAA  
3361 TAATATTGAA AAAGGAAGAG TCCTGAGGCG GAAAGAACCA GCTGTGGAAT GTGTGTCAGT  
3421 TAGGGTGTGG AAAGTCCCCA GGCTCCCCAG CAGGCAGAAG TATGCAAAGC ATGCATCTCA  
3481 ATTAGTCAGC AACCAGGTGT GGAAAGTCCC CAGGCTCCCC AGCAGGCAGA AGTATGCAAA  
3541 GCATGCATCT CAATTAGTCA GCAACCATAG TCCCGCCCCC AACTCCGCCC ATCCCGCCCC  
3601 TAACTCCGCC CAGTTCGCCC CATTCTCCGC CCCATGGCTG ACTAATTTTT TTTATTTATG  
3661 CAGAGGCCGA GGCCGCTCG GCCTCTGAGC TATTCCAGAA GTAGTGAGGA GGCTTTTTTTG  
3721 GAGGCCTAGG CTTTTGCAAA GATCGATCAA GAGACAGGAT GAGGATCGTT TCGCATGATT  
3781 GAACAAGATG GATTGCACGC AGGTTCTCCG GCCGCTTGGG TGGAGAGGCT ATTCGGCTAT  
3841 GACTGGGCAC AACAGACAAT CGGCTGCTCT GATGCCGCCG TGTTCCGGCT GTCAGCGCAG  
3901 GGGCGCCCCG TTCTTTTTGT CAAGACCGAC CTGTCCGGTG CCCTGAATGA ACTGCAAGAC  
3961 GAGGCAGCGC GGCTATCGTG GCTGGCCACG ACGGGCGTTC CTTGCGCAGC TGTGCTCGAC  
4021 GTTGTCACTG AAGCGGGAAG GGACTGGCTG CTATTGGGCG AAGTGCCGGG GCAGGATCTC  
4081 CTGTCACTC ACCTTGCTCC TGCCGAGAAA GTATCCATCA TGGCTGATGC AATGCGGCGG  
4141 CTGCATACGC TTGATCCGGC TACCTGCCCA TTCCGACCACC AAGCGAAACA TCGCATCGAG  
4201 CGAGCACGTA CTCGGATGGA AGCCGGTCTT GTCGATCAGG ATGATCTGGA CGAAGAGCAT  
4261 CAGGGGCTCG CGCCAGCCGA ACTGTTCCGC AGGCTCAAGG CGAGCATGCC CGACGGCGAG  
4321 GATCTCGTCG TGACCCATGG CGATGCCTGC TTGCCGAATA TCATGGTGGA AAATGGCCGC  
4381 TTTTCTGGAT TCATCGACTG TGGCCGGCTG GGTGTGGCGG ACCGCTATCA GGACATAGCG  
4441 TTGGCTACCC GTGATATTGC TGAAGAGCTT GGGCGGAAT GGGCTGACCG CTTCCTCGTG  
4501 CTTTACGGTA TCGCCGCTCC CGATTCCGAG CGCATCGCCT TCTATCGACT TCTATCGAG  
4561 TTCTTCTGAG CGGGACTCTG GGGTTCGAAA TGACCGACCA AGCGACGCC AACCTGCCAT  
4621 CACGAGATTT CGATTCCACC GCCGCCTTCT ATGAAAGGTT GGGCTTCGGA ATCGTTTTCC  
4681 GGGACGCCGG CTGGATGATC CTCCAGCGCG GGGATCTCAT GCTGGAGTTC TTCGCCCACC  
4741 CTAGGGGGAG GCTAACTGAA ACACGGAAGG AGACAATACC GGAAGGAACC CGCGCTATGA  
4801 CGGCAATAAA AAGACAGAAT AAAACGCACG GTGTTGGGTC GTTTGTTCAT AAACGCGGGG  
4861 TTCGGTCCCA GGGCTGGCAC TCTGTGATA CCCCACCGAG ACCCATTTGG GGCCAATACG  
4921 CCCGCTTTC TTCTTTTTCC CCACCCACC CCCCAGTTC GGGTGAAGGC CCAGGGCTCG  
4981 CAGCCAACGT CGGGGCGGCA GGCCCTGCCA TAGCCTCAGG TTACTIONAT ATACTTTAGA  
5041 TTGATTTAAA ACTTCATTTT TAATTTAAA GGATCTAGGT GAAGATCCTT TTTGATAATC  
5101 TCATGACCAA AATCCCTTAA CGTGAGTTTT CGTTCCTACTG AGCGTCAGAC CCCGTAGAAA  
5161 AGATCAAAGG ATCTTCTTGA GATCCTTTTT TTCTGCGCGT AATCTGCTGC TTGCAAACAA  
5221 AAAAACCACC GCTACCAGCG GTGGTTTTGT TGCCGGATCA AGAGCTACCA ACTCTTTTTTC  
5281 CGAAGGTAAC TGGCTTCAGC AGAGCGCAGA TACCAAATAC TGTCTTCTA GTGTAGCCGT  
5341 AGTTAGGCCA CCACTTCAAG AACTCTGTAG CACCGCCTAC ATACCTCGCT CTGCTAATCC  
5401 TGTTACCAGT GGCTGCTGCC AGTGGCGATA AGTCGTGTCT TACCGGGTTG GACTCAAGAC  
5461 GATAGTTACC GGATAAGGCG CAGCGGTCCG GCTGAACGGG GGGTTCGTGC ACACAGCCCA  
5521 GCTTGGAGCG AACGACCTAC ACCGAAGTGA GATACCTACA GCGTGAGCTA TGAGAAAGCG  
5581 CCACGCTTCC CGAAGGGAGA AAGGCGGACA GGTATCCGGT AAGCGGCAGG GTCGGAACAG  
5641 GAGAGCGCAC GAGGGAGCTT CCAGGGGAA ACGCCTGGTA TCTTTATAGT CCTGTGCGGT  
5701 TTCGCCACCT CTGACTTGAG CGTGCATTTT TGTGATGCTC GTCAGGGGGG CGGAGCCTAT  
5761 GGAAAAACGC CAGCAACGCG GCCTTTTTTAC GGTTCCTGGC CTTTTGCTGG CTTTTGCTC  
5821 ACATGTTCTT TCCTGCGTTA TCCCCTGATT CTGTGGATAA CCGTATTACC GCCATGCAT

//
